# Supplementary material for: Long-read genome sequencing enhances diagnostics of pediatric neurological disorders
Source: Research Square preprint supplement (doi:10.21203/rs.3.rs-6863124/v1), 2025-06-25
Supplement: Supplementary file 1 [file 80f34c0ea5e38707e9ff3e15.xlsx]

## Sheet: Sheet1
Sample Name	Vars	SNP	Indel	Ts/Tv	Median Coverage	Bases ≥ 30X	Error rate	M Non-Primary	M Reads Mapped	% Mapped	M Total seqs
2023-30344-07	4740514	3905062	835446	2.02	36.0X	0.79	3.23%	7.2	21.8	99.6%	21.9
2023-30830-05	4872251	4035788	836460	2.02	41.0X	0.94	2.86%	19.4	61.3	99.4%	61.7
2023-31655-05	5450966	4246942	1204024	1.92	40.0X	0.92	8.25%	4.1	15.4	99.3%	15.5
2023-31928-04	5266755	4150692	1116063	1.95	46.0X	0.97	3.14%	6.2	21.4	99.9%	21.4
2023-32195-07	5647279	4348681	1298598	1.92	33.0X	0.7	6.16%	3.1	9.9	99.3%	10.0
2023-33331-05	6535031	4917397	1617634	1.92	16.0X	0.01	8.71%	2.0	7.4	98.9%	7.5
2023-33503-05	4774470	3955983	818484	2.02	39.0X	0.91	6.15%	4.3	15.3	98.0%	15.6
2023-33526-05	5442200	4212206	1229994	1.93	39.0X	0.87	7.60%	4.8	16.5	99.2%	16.6
2023-33687-05	5728013	4384236	1343777	1.92	26.0X	0.3	7.53%	3.0	11.3	99.3%	11.4
2023-34375-05	4743647	3923645	819999	2.02	35.0X	0.78	3.17%	12.8	37.2	99.4%	37.4
2023-34719-05	5396089	4194749	1201340	1.93	40.0X	0.89	4.10%	6.5	20.8	99.9%	20.8
2023-34874-02	5361794	4161450	1200344	1.94	35.0X	0.79	3.23%	4.8	15.7	99.9%	15.7
2023-35243-08	4736948	3925447	811496	2.02	27.0X	0.37	3.30%	5.8	17.7	99.6%	17.8
2023-35469-05	4736012	3937319	798688	2.02	34.0X	0.74	5.82%	4.8	17.4	97.2%	17.9
2023-35712-06	4670454	3893171	777279	2.02	33.0X	0.68	6.83%	4.8	14.8	97.5%	15.2
2023-36091-05	5776385	4797765	978613	2.02	34.0X	0.75	6.46%	3.2	9.2	98.2%	9.4
2023-36713-07	5300098	4158209	1141889	1.95	40.0X	0.93	3.24%	4.6	15.7	99.9%	15.8
2023-36741-04	4957041	4074597	882442	2.02	37.0X	0.85	3.26%	4.3	14.7	99.8%	14.7
2023-36792-05	5361292	4170389	1190903	1.94	33.0X	0.73	3.31%	4.0	12.6	99.9%	12.6
2023-36972-05	5290211	4406097	884109	2.03	29.0X	0.48	6.22%	2.9	8.8	98.2%	9.0
2023-37016-05	6083075	4766952	1316123	1.95	39.0X	0.91	4.14%	3.0	10.6	99.9%	10.6
2023-37091-05	4814046	3952684	861360	2.02	36.0X	0.8	3.39%	4.1	12.6	99.8%	12.6
2023-37721-06	5774010	4413503	1360507	1.91	26.0X	0.29	4.69%	1.9	6.7	99.8%	6.7
2023-37728-06	5701446	4345588	1355858	1.92	27.0X	0.35	4.96%	2.6	9.1	99.8%	9.1
2023-37930-07	5626404	4278110	1348294	1.91	27.0X	0.35	4.78%	2.4	7.8	99.8%	7.8
2023-37933-07	5676158	4336675	1339483	1.92	27.0X	0.32	4.64%	2.1	7.5	99.7%	7.5
2023-38113-06	5614803	4333638	1281165	1.93	33.0X	0.72	8.23%	2.3	8.2	99.3%	8.2
2023-38396-05	4727740	3939309	788426	2.02	24.0X	0.18	3.08%	6.5	20.3	99.7%	20.4
2023-38527-04	5580297	4286070	1294227	1.92	29.0X	0.47	4.71%	3.2	11.2	99.8%	11.2
2023-39079-05	4820787	3999112	821673	2.02	33.0X	0.72	6.17%	3.1	10.8	97.9%	11.0
2023-39366-04	5519043	4258396	1260647	1.92	34.0X	0.75	5.63%	2.7	9.6	99.6%	9.7
2023-39466-05	6025137	4452846	1572291	1.90	16.0X	0.01	5.79%	2.5	7.9	99.0%	8.0
2023-39540-04	5559192	4265343	1293849	1.92	28.0X	0.43	4.36%	3.1	10.8	99.8%	10.8
2023-40605-05	5361762	4171632	1190130	1.94	45.0X	0.92	4.19%	4.5	14.6	99.9%	14.6
2023-40922-05	6118999	4612469	1506530	1.91	19.0X	0.03	8.98%	1.8	5.9	99.0%	5.9
2023-41446-05	5849257	4448712	1400545	1.91	22.0X	0.1	9.73%	2.4	7.9	99.0%	8.0
2023-42318-04	6290737	4566833	1723904	1.88	12.0X	0	5.02%	1.3	4.4	99.4%	4.4
2023-42375-05	4735033	3938264	796765	2.02	33.0X	0.68	6.16%	4.9	15.2	98.0%	15.5
2023-43953-05	4680663	3896861	783801	2.02	35.0X	0.77	6.03%	7.6	23.8	96.4%	24.7
2023-44364-04	5627663	4300789	1326874	1.92	27.0X	0.32	8.47%	2.4	8.7	99.3%	8.7
2023-44548-05	5582378	4306700	1275678	1.92	30.0X	0.54	9.49%	4.7	15.8	99.0%	16.0
2023-44695-05	5766416	4383063	1383353	1.91	22.0X	0.1	10.21%	2.2	7.3	99.2%	7.3
2023-44797-06	5846187	4487387	1358800	1.92	26.0X	0.3	10.83%	1.9	6.3	99.2%	6.3
2023-44953-05	5550745	4284622	1266123	1.93	38.0X	0.84	8.06%	2.7	9.1	99.4%	9.1
2024-00164-05	5564582	4265769	1298813	1.92	30.0X	0.55	8.86%	3.2	9.9	99.4%	10.0
2024-00597-04	5627033	4292890	1334143	1.92	27.0X	0.33	4.49%	2.0	6.8	99.9%	6.8
2024-00598-04	5614226	4262811	1351415	1.91	27.0X	0.33	4.65%	2.1	7.1	99.8%	7.1
2024-00855-04	5418258	4197586	1220672	1.92	44.0X	0.92	6.93%	3.7	11.5	99.6%	11.6
2024-01058-05	5548676	4260536	1288140	1.92	29.0X	0.49	6.56%	4.6	17.2	99.3%	17.4
2024-01464-04					24.0X	0.17	10.56%	2.8	9.4	98.9%	9.5
2024-01866-05	5601034	4296742	1304292	1.91	28.0X	0.39	4.86%	3.1	11.1	99.7%	11.2
2024-01889-05	5453239	4224169	1229070	1.92	38.0X	0.86	4.41%	3.4	10.9	99.9%	10.9
2024-01890-05	5732845	4377353	1355492	1.92	28.0X	0.38	4.63%	2.5	8.4	99.8%	8.4
2024-02359-04	5635881	4281640	1354241	1.91	26.0X	0.32	4.95%	2.5	7.9	99.7%	7.9
2024-02809-05	5758710	4410179	1348531	1.92	29.0X	0.46	8.31%	2.6	8.9	99.4%	8.9
2024-02829-05	5619159	4297091	1322068	1.91	27.0X	0.31	4.47%	2.5	8.9	99.7%	8.9
2024-03905-05	5594269	4277554	1316715	1.92	28.0X	0.42	4.58%	2.2	7.7	99.9%	7.7
2024-04905-06	5550788	4249578	1301210	1.91	31.0X	0.57	5.07%	2.8	8.8	99.9%	8.8
2024-06334-05	5567883	4263775	1304108	1.91	30.0X	0.53	4.72%	3.0	9.6	99.9%	9.6

## Sheet: Sheet2
Sample Name	Median length	Read N50	Median Qual	Median Identity	# Reads (K)	Total Bases (Mb)	Aligned Bases (Mb)
2023-30344-07.nanostats	1792 bp	11599 bp	17.6	98.5%	23926.8	117004.9	110840.0
2023-30830-05.nanostats	873 bp	4762 bp	16.7	98.6%	67167.9	135162.6	126716.7
2023-33503-05.nanostats	4245 bp	15489 bp	18.1	98.2%	16527.9	130721.1	124187.6
2023-34375-05.nanostats	1037 bp	9219 bp	16.8	98.5%	40535.4	115909.3	109953.5
2023-35243-08.nanostats	1850 bp	11010 bp	17.7	98.5%	19675.2	91596.3	85473.1
2023-35469-05.nanostats	3595 bp	10644 bp	17.6	98.1%	18635.7	112139.8	106459.0
2023-35712-06.nanostats	3427 bp	14851 bp	17.2	97.9%	16228.1	110464.9	104286.9
2023-36091-05.nanostats	8843 bp	18435 bp	18.0	98.0%	10280.0	115999.6	109583.6
2023-36741-04.nanostats	6440 bp	12109 bp	18.2	98.4%	16143.9	120386.3	114227.5
2023-36972-05.nanostats	5559 bp	19341 bp	18.1	98.1%	9706.9	97734.4	92817.5
2023-37091-05.nanostats	7172 bp	13427 bp	18.7	98.4%	14233.1	119458.3	111663.7
2023-38396-05.nanostats	2137 bp	5940 bp	17.9	98.5%	23655.5	80376.6	75805.2
2023-39079-05.nanostats	5171 bp	17948 bp	18.1	98.2%	11729.1	111341.6	105916.3
2023-42375-05.nanostats	3316 bp	13208 bp	17.5	98.1%	16787.3	110239.0	103446.0
2023-43953-05.nanostats	2848 bp	6789 bp	17.4	98.1%	25761.5	117157.3	109709.6

## Sheet: Sheet3
Sample Name	Median length	Read N50	Median Qual	# Reads (K)	Total Bases (Mb)
2023-31655-05.nanostats	4307 bp	15570 bp	13.7	17557.6	140707.0
2023-31928-04.nanostats	4668 bp	10048 bp	22.1	21709.5	144469.4
2023-32195-07.nanostats	7086 bp	18022 bp	17.1	10546.8	109039.7
2023-33331-05.nanostats	3507 bp	15255 bp	13.0	8682.1	59122.5
2023-33526-05.nanostats	3984 bp	14948 bp	14.9	18144.2	134537.6
2023-33687-05.nanostats	4028 bp	14458 bp	14.2	12726.4	92669.5
2023-34719-05.nanostats	3378 bp	11978 bp	18.3	21243.3	129083.8
2023-34874-02.nanostats	4360 bp	12915 bp	21.3	15937.0	111551.9
2023-36713-07.nanostats	5114 bp	13413 bp	22.2	16009.5	126521.5
2023-36792-05.nanostats	5565 bp	14191 bp	21.8	12792.4	106574.2
2023-37016-05.nanostats	11450 bp	16719 bp	18.8	10884.4	124816.7
2023-37721-06.nanostats	12297 bp	17604 bp	18.1	7002.0	85404.5
2023-37728-06.nanostats	6232 bp	16636 bp	17.1	9473.6	87980.0
2023-37930-07.nanostats	8667 bp	17700 bp	17.9	8093.6	87890.1
2023-37933-07.nanostats	9818 bp	17866 bp	17.8	7856.8	86771.8
2023-38113-06.nanostats	12686 bp	17985 bp	13.7	9656.0	118852.8
2023-38527-04.nanostats	4505 bp	15785 bp	17.3	11585.9	93841.3
2023-39366-04.nanostats	9030 bp	17619 bp	17.8	10027.8	110489.2
2023-39466-05.nanostats	3135 bp	13312 bp	17.3	8513.1	51649.8
2023-39540-04.nanostats	4439 bp	16419 bp	18.0	11081.8	92026.8
2023-40605-05.nanostats	5743 bp	17243 bp	18.7	14961.9	142014.0
2023-40922-05.nanostats	6350 bp	18639 bp	12.7	6969.0	70393.2
2023-41446-05.nanostats	4702 bp	16677 bp	11.4	10064.0	86592.5
2023-42318-04.nanostats	4648 bp	15649 bp	16.8	4747.9	38522.8
2023-44364-04.nanostats	6168 bp	17326 bp	13.3	9944.4	95713.3
2023-44548-05.nanostats	3346 bp	11709 bp	11.5	19843.9	117800.2
2023-44695-05.nanostats	5932 bp	16986 bp	10.6	9571.0	90648.5
2023-44797-06.nanostats	12781 bp	19437 bp	9.9	8417.1	108850.9
2023-44953-05.nanostats	13442 bp	17629 bp	14.3	10108.1	129488.2
2024-00164-05.nanostats	6044 bp	16737 bp	13.2	11610.0	110562.0
2024-00597-04.nanostats	12206 bp	17950 bp	18.1	6998.4	86924.6
2024-00598-04.nanostats	11720 bp	17539 bp	17.8	7352.9	86343.1
2024-00855-04.nanostats	11065 bp	17883 bp	16.4	12247.9	144072.5
2024-01058-05.nanostats	3209 bp	8647 bp	15.4	18776.8	100424.7
2024-01464-04.nanostats	4408 bp	14842 bp	9.8	12804.0	101267.5
2024-01866-05.nanostats	3884 bp	16593 bp	16.9	11648.0	90612.2
2024-01889-05.nanostats	7328 bp	18832 bp	18.3	11209.6	122162.9
2024-01890-05.nanostats	7318 bp	17796 bp	17.6	8669.6	88572.8
2024-02359-04.nanostats	9663 bp	16506 bp	17.4	8263.9	85897.6
2024-02809-05.nanostats	6543 bp	17790 bp	14.1	9917.5	100495.7
2024-02829-05.nanostats	5163 bp	17501 bp	18.0	9384.7	86481.7
2024-03905-05.nanostats	11280 bp	16727 bp	18.0	7937.4	90553.0
2024-04905-06.nanostats	8282 bp	17964 bp	17.7	9076.1	99216.7
2024-06334-05.nanostats	6335 bp	16940 bp	17.9	9916.0	96561.0
