# Supplementary material for: Long-read genome sequencing enhances diagnostics of pediatric neurological disorders
Source: Research Square preprint supplement (doi:10.21203/rs.3.rs-6863124/v1), 2025-06-25
Supplement: Supplementary file 2 [file 903534a2a92efdf0ff1c16bf.xlsx]

## Sheet: Sheet1
Table S2. The clinically relevant findings from long-read GS
SINGLE NUCLEOTIDE VARIANT AND/OR SMALL INSERTION/DELETION (<50 bp)
Individual	Age	Gender	Variant type	Variant type	Gene	HGVS description	Protein effect	ACMG classification	Zygosity	Heredity	Diagnosis	MIM ID	Inheritance pattern	Phenotypic expression (HPO terms)
RD_P619	17 y	M	INDEL	Frame shift	SHANK2	NM_133266.4:c.1777_1795dup	p.Ala599GlyfsTer31	4. Likely pathogenic	heterozygous	de novo	{Autism susceptibility 17}	613436		Esophageal atresia, duodenal atresia, anal atresia, Ventricular septal defect, Patent foramen ovale, tethered cord, cryptorchidism, asthma, ID, ADHD, autism, postural instability, poor fine motor coordination
RD_P627	5 y	F	SNV	Nonsense	HIVEP2	NM_006734.4:c.6661C>T	p.Gln221Ter	4. Likely pathogenic	heterozygous	NI	Intellectual developmental disorder, autosomal dominant 43	616977	AD	ID, global developmental delay
RD_P649	1 y	F	SNV	Other	ARID1A	NM_006015.6c.3236-3239delinsG	p.Asn1079_Leu1080delinsSer	4. Likely pathogenic	heterozygous	de novo	Coffin-Siris syndrome 2	614607	AD	Increased nuchal translucency, plagiocephaly, exotropia, abnormal optic disc morphology, wide nose, global developmental delay, absent speech
RD_P650	3 y	F	SNV	Nonsense	KMT2A	NM_001197104.2:c.4504C>T	p.Arg1502Ter	5. Pathogenic	heterozygous	de novo	Wiedemann-Steiner syndrome	605130	AD	Tethered cord, motor delay, lower limb hypertonia, ID
RD_P652	16 y	F	SNV	Nonsense	IRF2BPL	NM_024496.4:c.361C>T	p.Gln121Ter	5. Pathogenic	heterozygous	de novo	Neurodevelopmental disorder with regression, abnormal movements, loss of speech, and seizures	618088	AD	Obesity, language impairment, seizure, ID, autism
RD_P660	2 y	F	SNV	Missense	DDX3X	NM_001356.5:c.1582C>T	p.Arg528Cys	5. Pathogenic	heterozygous	de novo	Intellectual developmental disorder, Snijders Blok type	300958	XL	Global developmental delay, almond-shaped palpebral fissure, downslanted palpebral fissures, highly arched eyebrow, protruding ear, low-set ears
RD_P661	2 y	M	SNV	Missense	PTEN	NM_000314.8:c.520T>C	p.Tyr174His	4. Likely pathogenic	heterozygous	paternal de novo (symptomatic)	Macrocephaly/autism syndrome	605309	AD	Tall stature, macrocephaly, hypertelorism, wide nose, depressed nasal ridge, autistic behaviour, ID
RD_P662	12 y	F	SNV	Missense	SGCA	NM_000023.4:c.229C>T	p.Arg77Cys	5. Pathogenic	homozygous	NI	Muscular dystrophy, limb-girdle, autosomal recessive 3	608099	AR	Elevated hepatic transaminase, highly elevated creatine kinase, muscle weakness, slowly progressive
RD_P673	14 y	F	SNV	Frame shift	PUF60	NM_078480.3:c.698_699del	p.Val33AlafsTer8	4. Likely pathogenic	heterozygous	de novo	Verheij syndrome	615583	AD	Short stature, hearing impairment, tetralogy of Fallot, ID
RD_P674	5 y	M	SNV	Nonsense	LMNB1	NM_005573.4:c.1544G>A	p.Trp515Ter	4. Likely pathogenic	heterozygous	maternal mosaic	Microcephaly 26, primary, autosomal dominant	619179	AD	Microcephaly, delayed speech and language development, tip-toe gait, hyperactivity, autism
RD_P677	1 y	F	SNV	Missense	NFIX	NM_002501:c.89G>C	p.Trp30Ser	4. Likely pathogenic	heterozygous	de novo	Malan syndrome	614753	AD	Global developmental delay, ID, opto-chiasmatic atrophy, macrocephaly, frontal bossing, epicanthus, protruding ear, low-set ears, triangular face
RD_P685	13 y	F	SNV	Nonsense	ARHGEF9	NM_001173479:c.46G>T	p.Glu16Ter	5. Pathogenic	heterozygous	de novo	Developmental and epileptic encephalopathy 8	300607	XL	Autistic behaviour
RD_P686	7 y	F	INDEL	Frame shift	MED13L	NM_015335.5:c.5796_5806del	p.Cys1932TrpfsTer12	5. Pathogenic	heterozygous	de novo	Impaired intellectual development and distinctive facial features with or without cardiac defects	616789	AD	Autism, delayed speech and language development, motor delay
RD_P690	1 y	F	INDEL	Nonsense	ADNP	NM_181442.4:c.1035_1038del	p.Ser346Ter	5. Pathogenic	heterozygous	de novo	Helsmoortel-van der Aa syndrome	615873	AD	Motor delay
RD_P692	10 y	M	SNV	Frame shift	ANKRD11	NM_013275.6:c.1903_1907del	p.Lys635GlnfsTer26	5. Pathogenic	heterozygous	NI (no parental samples)	KBG syndrome	148050	AD	ADHD, autistic behaviour, abnormality of the middle ear ossicles, broad chin, widely spaced teeth, protruding tongue, kyphosis
RD_P694	6 y	F	SNV + INDEL	Nonsense Frame shift	SGCA	NM_000023.4:c.557A>T NM_000023.4:c.348_352dup	p.Lys193Ter p.Gln118ProfsTer9	4. Likely pathogenic	compound heterozygous	Parents heterozygous carriers	Muscular dystrophy, limb-girdle, autosomal recessive 3 #608099	608099	AR	Muscular dystrophy, tip-toe gait
RD_P713	11 y	M	SNV	Nonsense	NAA15	NM_057175.5:c.198T>A	p.Tyr66Ter	4. Likely pathogenic	heterozygous	de novo	Intellectual developmental disorder, autosomal dominant 50, with behavioral abnormalities	617787	AD	ID, ADHD, microcephaly
RD_P714	12 y	F	SNV	Missense	KMT5B	NM_017635.5:c.933C>A	p.Phe311Leu	4. Likely pathogenic	heterozygous	de novo	Intellectual developmental disorder, autosomal dominant 51	617788	AD	ID, hypothyroidism
RD_P680	9 y	F	SNV	Missense	PHIP	NM_017934.7:c.3671T>G	pLeu1224Arg	3. VUS	heterozygous	de novo	Chung-Jansen syndrome	617991	AD	Autism, ADHD, cognitive impairment
RD_P684	8 m	M	INDEL	Other	SLC16A2	NM_006517.5:c.1344_1376del	p.Ile448_Pro458del	3. VUS	hemizygous	maternal de novo	Allan-Herndon-Dudley syndrome	300523	XL	Narrow face, exotropia, hypotonia, persistent head lag, growth delay, dysphagia
RD_P712	1 d	F	SNV + SNV	Missense Nonsense	COL12A1	NM_004370.6:c.8861G>A NM_004370.6:c.165C>G	p.Gly2954Glu p.Tyr55Ter	3. VUS	compound heterozygous	Parents heterozygous carriers	?Ullrich congenital muscular dystrophy 2 Bethlem myopathy 2	616470 616471	AR AD	Muscle weakness
RD_P715	1 y	M	INDEL	Other	CHD3	NM_001005273.3:c.3457_3459del	p.Ile1153del	3. VUS	heterozygous	maternal (symptomatic)	Snijders Blok-Campeau syndrome	618205	AD	Motor delay
MONOGENIC/INTRAGENIC STRUCTURAL VARIANT (<500 kb)
Individual	Age	Gender	Variant type	Variant type	Gene/Size	ISCN 2020/HGVS		ACMG classification	Zygosity	Heredity	Diagnosis	MIM ID	Inheritance pattern
RD_P623	3 y	F	SV	DEL	SMN1	seq[GRCh37] del(5)(q13.2q13.2) homozygous SMN1 deletion		5. Pathogenic	homozygous	Parents heterozygous carriers	Spinal muscular atrophy-3	253400	AR	Progressive muscle weakness
RD_P634	13 y	M	SV	DEL	DMD	seq[GRCh37] del(X)(p21.1p21.1) NM_004006.3(DMD):c.6439-10307_8217+1537del		5. Pathogenic	hemizygous	NI	Duchenne muscular dystrophy Becker muscular dystrophy	310200 300376	XL	Spasticity, highly elevated creatine kinase, muscle weakness
RD_P693	12 y	M	SV	DEL	DMD	seq[GRCh37] del(X)(p21.1p21.1) NM_004006.3(DMD):c.6439-25504_8217+48155		5. Pathogenic	hemizygous	de novo	Duchenne muscular dystrophy Becker muscular dystrophy	310200 300376	XL	Muscle weakness
RD_P695	1 y	M	SV	INV	FGF14	seq[GRCh37] inv(13)(q31.1q33.1) NC_000013.10:g.81906037_102568792delins[g.81913664_102568782inv]		5. Pathogenic	heterozygous	de novo	Spinocerebellar ataxia 27A	193003	AD	Delayed ability to walk, macrocephaly, ecreased facial expression
RD_P696	13 y	F	SV	DUP	EHMT1	seq[GRCh37] dup(9)(q34.3) NC_000009.11:140530251_140792920dup		3. VUS	heterozygous	paternal	9q34.3 microduplication syndrome?			ID
LARGE STRUCTURAL VARIANT (>500 kb)
RD_P630	1 y	F	SV	DUP	2.51 Mb	seq[GRCh37] dup(22)(q11.21q11.21) NC_000022.10:g.18940002_21450001del*		5. Pathogenic	heterozygous	maternal	Chromosome 22q11.2 microduplication syndrome	608363	AD	Global developmental delay
RD_P633	10 y	M	SV	TRANSLOCATION	11.7 Mb	seq[GRCh38] der(14)t(8;14)(p11.2;p23.1) NC_060938.1:g.pter_8916466delins[NC_060932.1:g.pter_11706328]		5. Pathogenic	heterozygous	(Should we write de novo when it might be a translocation???)	8p23 duplication syndrome			ID, autistic behaviour, ADHD
RD_P639	1 y	F	SV	DEL	747 Kb	seq[GRCh37] del(1)(q44q44) NC_000001.11:g.244956286_245702958del		5. Pathogenic	heterozygous	de novo	Developmental and epileptic encephalopathy 54	617391	AD	Congenital hypothyroidism, orofacial cleft, conductive hearing impairment, global developmental delay, muscle weakness, joint hypermobility, seizure precipitated by febrile infection, hypotonia
COMPLEX STRUCTURAL VARIANT
RD_P651	2 y	F	CCR	DEL-INV-DUP	1.84 Mb/17.75Mb	der(9)del(9)(p24.3p24.3)ins(9)(p24.3p22.1p24.3) NC_000009.11:g.pter_1846878delins[g.1847730_19598066inv]		5. Pathogenic	heterozygous	de novo	9p duplication syndrome			Microcephaly, short stature, global developmental delay, hypertelorism, wide nose
RD_P655	9 m	F	CCR	DEL/RING	15.4 Mb/13.8 Mb	r(18)(p11.21q22.1)/del(p11.32p11.21) NC_000018.10:g.[pter_15408000del;64254140_qterdel]/g.pter_15408000del		5. Pathogenic	heterozygous mosaic	de novo	18p deletion syndrome 18q deletion syndrome			Motor delay, deep philtrum, sacral dimple, square face, midface retrusion, constipation
SHORT TANDEM REPEAT EXPANSION
RD_P698	2 y	M	STR	Full expansion	FMR1	654 CGG repeat		5. Pathogenic	hemizygous	maternal premutation	Fragile X syndrome	300624	XL	global developmental delay, protruding ear, hypertelorism, happy demeanor, brain imaging abnormality, feeding difficulties, delayed speech and language development
UNIPARENTAL DISOMY
RD_P706	11 d	M	UPD	Isodisomy	Chr15	UPD15mat PWS		5. Pathogenic	NA	NA	Prader-Willi syndrome	176270	AD	Muscular dystrophy, pulmonary hypoplasia, hypotonia, hyperplasia of the maxilla, abnormality of the larynx
SNV, single nucleotide variant; INDEL, small insertion/deletion; SV, structural variant ; STR, short tandem repeat; UPD, uniparental disomy; DEL, deletion; DUP, duplication; INV, inversion; Chr, chromosome, AD, autosomal dominant; AR, autosomal recessive; XL, X-linked; ID, intellectual disability; ADHD, attention deficit hyperactivity disorder; bp, base pair; kb, kilo bases; Mb, mega bases.
* imprecise breakpoints, ** coordinates of gene, *** coordinates of repeat
